# Supplementary material for: Discerning Transcriptomic and Biochemical Responses of Arabidopsis thaliana Treated with the Biofertilizer Strain Priestia megaterium YC4-R4: Boosting Plant Central and Secondary Metabolism
Source: MDPI journal article supplement (doi:10.3390/plants11223039), 2022-11-10
Supplement: s1 [file s1]

**Table S1.** Upregulated genes in RNA-seq analysis. Genes with a minimal of 0.7 in log2FC

| Gene ID   | log2FC | p-value  | FDR      | Gene Type                                    |
|-----------|--------|----------|----------|----------------------------------------------|
| AT2G24980 | 1,8400 | 1,15E-12 | 1,13E-10 | Proline-rich extensin-like                   |
| AT3G60140 | 1,6709 | 9,45E-32 | 8,83E-29 | Glycosyl hydrolase                           |
| AT4G25820 | 1,5949 | 1,06E-16 | 1,85E-14 | Xyloglucan endotransglucosylase/hydrolase 14 |
| AT3G24460 | 1,4744 | 1,13E-28 | 8,21E-26 | Sphingolipid biosynthesis protein            |
| AT5G24150 | 1,4604 | 4,56E-61 | 4,47E-57 | FAD/NAD(P)-binding oxidoreductase            |
| AT3G44300 | 1,4254 | 2,06E-46 | 4,04E-43 | Nitrilase 2                                  |
| AT5G06640 | 1,3736 | 5,26E-09 | 2,80E-07 | Proline-rich extensin-like                   |
| AT5G08640 | 1,3403 | 1,22E-23 | 4,90E-21 | Flavonol synthase 1                          |
| AT5G56080 | 1,2733 | 1,34E-09 | 8,07E-08 | Nicotianamine synthase 2                     |
| AT1G64780 | 1,2690 | 2,91E-21 | 8,92E-19 | Ammonium transporter 1;2                     |
| AT3G21670 | 1,2036 | 3,02E-38 | 3,48E-35 | Major facilitator                            |
| AT1G32900 | 1,1899 | 7,58E-40 | 9,30E-37 | UDP-Glycosyltransferase                      |
| AT1G65060 | 1,1446 | 3,76E-25 | 1,94E-22 | 4-coumarate:CoA ligase 3                     |
| AT4G19690 | 1,1446 | 4,63E-15 | 6,63E-13 | Iron-regulated transporter 1                 |
| AT5G45070 | 1,0757 | 7,87E-11 | 5,55E-09 | Phloem protein 2-A8                          |
| AT5G04950 | 1,0591 | 1,43E-24 | 6,86E-22 | Nicotianamine synthase 1                     |
| AT2G32530 | 1,0507 | 9,77E-17 | 1,73E-14 | Cellulose synthase-like B3                   |
| AT4G16590 | 1,0260 | 3,84E-11 | 2,84E-09 | Cellulose synthase-like A01                  |
| AT4G10120 | 1,0234 | 8,89E-30 | 7,27E-27 | Sucrose-phosphate synthase                   |
| AT1G01580 | 1,0217 | 5,31E-15 | 7,55E-13 | Ferric reduction oxidase 2                   |
| AT3G54590 | 0,9654 | 3,53E-08 | 1,59E-06 | Hydroxyproline-rich glycoprotein             |
| AT3G44990 | 0,9639 | 1,39E-25 | 7,34E-23 | Xyloglucan endo-transglycosylase-related 8   |
| AT4G12320 | 0,9598 | 9,20E-28 | 5,82E-25 | Cytochrome P450                              |
| AT2G32270 | 0,9347 | 4,76E-05 | 9,69E-04 | Zinc transporter 3 precursor                 |
| AT2G41290 | 0,9298 | 2,22E-07 | 8,44E-06 | Strictosidine synthase-like 2                |
| AT4G27030 | 0,9260 | 1,38E-13 | 1,57E-11 | Fatty acid desaturase A                      |
| AT1G60590 | 0,9208 | 1,16E-10 | 7,95E-09 | Pectin lyase-like                            |
| AT4G24000 | 0,9068 | 4,10E-11 | 3,02E-09 | Cellulose synthase like G2                   |
| AT1G62180 | 0,8843 | 3,44E-23 | 1,30E-20 | 5'-adenylylphosphosulfate reductase 2        |
| AT5G58770 | 0,8634 | 1,87E-16 | 3,14E-14 | Undecaprenyl pyrophosphate synthetase        |
| AT1G61120 | 0,8215 | 4,96E-19 | 1,26E-16 | Terpene synthase 04                          |
| AT5G07010 | 0,8187 | 7,93E-13 | 8,02E-11 | Sulfotransferase 2A                          |
| AT4G26850 | 0,8161 | 8,75E-22 | 2,86E-19 | Mannose-1-phosphate guanylyltransferase      |
| AT3G21560 | 0,8007 | 2,09E-20 | 6,12E-18 | UDP-Glycosyltransferase                      |
| AT3G24300 | 0,7905 | 3,23E-07 | 1,18E-05 | Ammonium transporter 1;3                     |
| AT5G43630 | 0,7870 | 4,51E-17 | 8,50E-15 | Zinc knuckle (CCHC-type)                     |
| AT4G14090 | 0,7838 | 2,31E-10 | 1,53E-08 | UDP-Glycosyltransferase                      |
| AT5G43350 | 0,7813 | 5,56E-09 | 2,95E-07 | Phosphate transporter 1;1                    |
| AT4G15550 | 0,7781 | 6,90E-17 | 1,24E-14 | Indole-3-acetate beta-D-glucosyltransferase  |
| AT1G47510 | 0,7769 | 4,21E-04 | 6,04E-03 | Inositol polyphosphate 5-phosphatase 11      |
| AT3G46670 | 0,7729 | 1,12E-11 | 9,07E-10 | UDP-glucosyl transferase 76E11               |
| AT2G23010 | 0,7649 | 1,02E-09 | 6,24E-08 | Aerine carboxypeptidase-like 9               |
| AT2G23130 | 0,7268 | 6,50E-09 | 3,42E-07 | Arabinogalactan protein 17                   |
| AT3G52720 | 0,7257 | 4,13E-15 | 5,96E-13 | Alpha carbonic anhydrase 1                   |
| AT5G55380 | 0,7243 | 3,43E-05 | 7,26E-04 | Membrane bound O-acyl transferase            |
| AT1G56430 | 0,7229 | 1,05E-12 | 1,04E-10 | Nicotianamine synthase 4                     |
| AT2G32540 | 0,7196 | 2,35E-14 | 3,03E-12 | Cellulose synthase-like B4                   |
| AT2G25680 | 0,7154 | 1,91E-06 | 5,73E-05 | Molybdate transporter 1                      |
| AT5G17300 | 0,7134 | 1,12E-12 | 1,11E-10 | Homeodomain-like                             |
| AT3G45130 | 0,7065 | 1,67E-05 | 3,86E-04 | Lanosterol synthase 1                        |
