# Supplementary material for: Discerning Transcriptomic and Biochemical Responses of Arabidopsis thaliana Treated with the Biofertilizer Strain Priestia megaterium YC4-R4: Boosting Plant Central and Secondary Metabolism
Source: MDPI journal article supplement (doi:10.3390/plants11223039), 2022-11-10
Supplement: s1 [file s1]

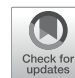

# Amelioration of Saline Stress on Chia (*Salvia hispanica* L.) Seedlings Inoculated With Halotolerant Plant Growth-Promoting Bacteria Isolated From Hypersaline Environments

## OPEN ACCESS

### Edited by:

Antonio Rafael Sánchez-Rodríguez,  
University of Cordoba, Spain

### Reviewed by:

Sheng Qin,  
Jiangsu Normal University, China  
Ana María García-López,  
University of Seville, Spain

### \*Correspondence:

Verónica Patricia Irazusta  
irazustaveronica@gmail.com

### †ORCID:

María Florencia Yañez-Yazlle  
orcid.org/0000-0002-1623-5715  
Neli Romano-Armada  
orcid.org/0000-0003-3148-2041  
Verónica Beatriz Rajal  
orcid.org/0000-0002-2290-8920  
Verónica Patricia Irazusta  
orcid.org/0000-0001-7436-8543

### Specialty section:

This article was submitted to  
Plant-Soil Interactions,  
a section of the journal  
Frontiers in Agronomy

**Received:** 08 February 2021

**Accepted:** 20 May 2021

**Published:** 17 June 2021

### Citation:

Yañez-Yazlle MF, Romano-Armada N,  
Rajal VB and Irazusta VP (2021)  
Amelioration of Saline Stress on Chia  
(*Salvia hispanica* L.) Seedlings  
Inoculated With Halotolerant Plant  
Growth-Promoting Bacteria Isolated  
From Hypersaline Environments.  
Front. Agron. 3:665798.  
doi: 10.3389/fagro.2021.665798

María Florencia Yañez-Yazlle<sup>1,2†</sup>, Neli Romano-Armada<sup>1,3†</sup>, Verónica Beatriz Rajal<sup>1,3,4†</sup> and Verónica Patricia Irazusta<sup>1,2\*†</sup>

<sup>1</sup> Instituto de Investigaciones para la Industria Química (INIQUI), Universidad Nacional de Salta (UNSa), Consejo Nacional de Investigaciones Científicas y Técnicas (CONICET), Salta, Argentina, <sup>2</sup> Facultad de Ciencias Naturales, Universidad Nacional de Salta (UNSa), Salta, Argentina, <sup>3</sup> Facultad de Ingeniería, Universidad Nacional de Salta (UNSa), Salta, Argentina,

<sup>4</sup> Singapore Centre for Environmental Life Sciences Engineering (SCELS), School of Biological Sciences, Nanyang Technological University (NTU), Singapore, Singapore

The rhizosphere and microbiome of halotolerant plants could be crucial for alleviating salinity stress during plant growth. The aims of this work were (1) to isolate bacteria from rhizosphere and bulk soil samples from the Salar del Hombre Muerto (Catamarca, Argentina), (2) to characterize different plant growth-promoting (PGP) activities produced by these bacterial isolates, and (3) to evaluate their effect on the initial growth of chia (*Salvia hispanica* L.) under saline stress. A total of 667 microorganisms were isolated, using different culture media with NaCl, and their abilities for nitrogen fixation, phosphate solubilization, siderophores production, and indole-3-acetic acid production were evaluated. Thirteen strains were selected for showing all the tested PGP activities; they belonged to the genera *Kushneria*, *Halomonas*, *Pseudomonas*, *Planomicrobium*, and *Pseudarthrobacter*. The strains *Kushneria* sp. and *Halomonas* sp. showed the highest salinity tolerance (from 50 to 2,000 mM NaCl) and biomass and biofilm production. Chia seeds were treated with six of the first 13 selected strains to evaluate their plant growth-promoting effect under saline stress (without and with 50 and 100 mM NaCl). *Halomonas* sp. 3R.12 and *Kushneria* sp. T3.7 produced heavier seedlings with a balanced shoot/root length ratio, while *Pseudomonas* sp. AN23 showed the best effect upon chia seedlings, with a morphological response similar to non-stressed seedlings. On the other hand, seedlings displayed no responses when inoculated with *Planomicrobium* sp. 3S.31 and *Pseudarthrobacter* sp. ER25. This study contributes to the knowledge on microorganisms from hypersaline environments as plant growth promoters for their use in the production of salt-sensitive crops, among other potential uses.

**Keywords:** halotolerant bacteria, nitrogen fixation, phosphate solubilization, siderophores production, indole-3-acetic acid production, biofilms production, *Kushneria*, *Halomonas*

- Mukhtar, S., Mehnaz, S., and Kauser, A. (2019). Microbial diversity in the rhizosphere of plants growing under extreme environments and its impact on crop improvement. *Environ. Sustain.* 2, 329–338. doi: 10.1007/s42398-019-00061-5
- Muñoz, L. A., Cobos, A., Diaz, O., and Aguilera, J. M. (2013). Chia seed (*Salvia hispanica*): an ancient grain and a new functional food. *Food Rev. Int.* 29, 394–408. doi: 10.1080/87559129.2013.818014
- Murashige, T., and Skoog, F. (1962). A revised medium for rapid growth and Bio assays with Tobacco tissue cultures. *Physiol. Plant.* 15, 474–497. doi: 10.1111/j.1399-3054.1962.tb08052.x
- Nagar, S., Kumar, A., Shalini, S., Mary, A. S., Pramod, C., and Rai, K. (2018). Aerobic biodegradation of HMX by *Planomicrobium flavidum*. *3 Biotech.* 8:455. doi: 10.1007/s13205-018-1479-5
- Navarro-Torre, S., Mateos-Naranjo, E., Caviedes, M. A., Pajuelo, E., and Rodríguez-Llorente, I. D. (2016). Isolation of plant-growth-promoting and metal-resistant cultivable bacteria from *Arthrocnemum macrostachyum* in the Odiel marshes with potential use in phytoremediation. *Mar. Pollut. Bull.* 110, 133–142. doi: 10.1016/j.marpolbul.2016.06.070
- Orona-Tamayo, D., Valverde, M. E., and Paredes-López, O. (2017). “Chia — The new golden seed for the 21st century : nutraceutical properties and technological uses,” in *Sustainable Protein Sources*, eds S. R. Nadathur, J. P. D. Wanasundara, and L. Scanlin (Elsevier Inc.), 265–281. doi: 10.1016/B978-0-12-802778-3.00017-2
- Palacio-Rodríguez, R., Coria-Arellano, J. L., López-Bucio, J., Sánchez-Salas, J., Muro-Pérez, G., Castañeda-Gaytán, G., et al. (2017). Halophilic rhizobacteria from *Distichlis spicata* promote growth and improve salt tolerance in heterologous plant hosts. *Symbiosis* 73, 179–189. doi: 10.1007/s13199-017-0481-8
- Panda, A., and Parida, A. K. (2019). “Development of salt tolerance in crops employing halotolerant plant growth- promoting rhizobacteria associated with halophytic rhizosphere soils,” in *Saline Soil-Based Agriculture by Halotolerant Microorganisms*, eds M. Kumar, H. Etesami, and V. Kumar (Singapore: Springer Nature Singapore Pte), 75–101. doi: 10.1007/978-981-13-8335-9\_4
- Pérez Brandán, J., Curti, R. N., and Acreche, M. M. (2020). Developmental responses of chia (*Salvia hispanica*) to variations in thermo-photoperiod : impact on subcomponents of grain yield. *Crop. Pasture Sci.* 71, 183–189. doi: 10.1071/CP19218
- Pilet, P. E., and Chollet, R. (1970). Sur le dosage colorimétrique de l'acide indolylacétique. *Comptes Rendus l'Acad. Sci.* 271, 1675–1678.
- Pospiech, A., and Neumann, B. (1995). A versatile quick-prep of genomic DNA from gram-positive bacteria. *Trends Genet.* 11, 217–218. doi: 10.1016/S0168-9525(00)89052-6
- Raimondi, G., Roupahel, Y., Di Stasio, E., Napolitano, F., Clemente, G., Maiello, R., et al. (2017). Evaluation of *Salvia hispanica* performance under increasing salt stress conditions. *Acta Hort.* 1170, 703–707. doi: 10.17660/ActaHortic.2017.1170.88
- Reginato, M., Sgro, V., Llanes, A., Cassán, F., and Luna, V. (2012). “The American halophyte *Prosopis strombulifera*, a new potential source to confer salt tolerance to crops,” in *Crop Production for Agricultural Improvement*, eds M. Ashraf, M. Öztürk, M. S. Aqeel Ahmad, and A. Aksoy (Dordrecht: Springer Science+Business Media B.V.), 20. doi: 10.1007/978-94-007-4116-4\_5
- Romano Armada, N., Doccia, F. G., Candeo, A., Valentini, G., Costa, A., and Bassi, A. (2019). *In vivo* light sheet fluorescence microscopy of calcium oscillations in *Arabidopsis thaliana*. *Calcium Signalling. Methods Mol. Biol.* 1925, 87–101. doi: 10.1007/978-1-4939-9018-4\_8
- Romano-Armada, N., Yañez Yazlle, M. F., Irazusta, V., Rajal, V. B., and Moraga, N. B. (2020). Potential of bioremediation and PGP traits in streptomycetes as strategies for bio-reclamation of salt-affected soils for agriculture. *Pathogens* 9:117. doi: 10.3390/pathogens9020117
- Sáenz-Mata, J., Palacio-Rodríguez, R., Sánchez- Galván, H., and Balagurusamy, N. (2016). “Plant growth promoting rhizobacteria associated to halophytes: potential applications in agriculture,” in *Sabkha Ecosystems*, eds M. Ajmal Khan, B. Boër, M. Öztürk, M. Clüsener-Godt, B. Gul, and S. W. Breckle (Cham: Springer International Publishing), 411–425. doi: 10.1007/978-3-319-27093-7\_24
- Schindelin, J., Arganda-Carreras, I., Frise, E., Kaynig, V., Longair, M., Pietzsch, T., et al. (2012). Fiji: an open-source platform for biological-image analysis. *Nat. Methods* 9, 676–682. doi: 10.1038/nmeth.2019
- Schwyn, B., and Neilands, B. (1987). Universal chemical assay for the detection determination of siderophores. *Anal. Biochem.* 160, 47–56. doi: 10.1016/0003-2697(87)90612-9
- Shankar, V., and Evelin, H. (2019). “Strategies for reclamation of saline soils,” in *Microorganisms in Saline Environments: Strategies and Functions*, eds B. Giri and A. Varma (Cham: Springer Nature Switzerland AG), 439–449. doi: 10.1007/978-3-030-18975-4\_19
- Shekhar Nautiyal, C. (1999). An efficient microbiological growth medium for screening phosphate solubilizing microorganisms. *FEMS Microbiol. Lett.* 170, 265–270. doi: 10.1111/j.1574-6968.1999.tb13383.x
- Srivastava, P., Wu, Q. S., and Giri, B. (2019). “Salinity : an overview,” in *Microorganisms in Saline Environments: Strategies and Functions*, eds B. Giri and A. Varma (Cham: Springer Nature Switzerland AG 2019 B.), 3–18. doi: 10.1007/978-3-030-18975-4\_1
- Stefanello, R., Neves, L. A., Abbad, M. A., and Viana, B. B. (2015). Resposta fisiológica de sementes de chia (*Salvia hispanica* – Lamiales: Lamiaceae) ao estresse salino. *Biotemas* 28:35. doi: 10.5007/2175-7925.2015v28n4p35
- Sugiura, D., and Tateno, M. (2011). Optimal leaf-to-root ratio and leaf nitrogen content determined by light and nitrogen availabilities. *PLoS ONE* 6:e22236. doi: 10.1371/journal.pone.0022236
- Tabatabaei, S., Ehsanzadeh, P., Etesami, H., Alikhani, H. A., and Glick, B. R. (2016). Indole-3-acetic acid (IAA) producing pseudomonas isolates inhibit seed germination and  $\alpha$ -amylase activity in durum wheat (*Triticum turgidum* L.). *Spanish J. Agric. Res.* 14, 1–10. doi: 10.5424/sjar/2016141-8859
- Thompson, L., and Troeh, F. (2002). *Suelos y Fertilidad, 4th Edn.* Spain: Editorial Reverte SA.
- Turan, M., Kitir, N., Elkoca, E., Uras, D., Ünek, C., Nikerel, E., et al. (2017). “Nonsymbiotic and symbiotic bacteria efficiency for legume growth under different stress conditions,” in *Microbes for Legume Improvement*, eds A. Zaidi, M. S. Khan, and J. Musarrat (Cham: Springer International Publishing), 387–404. doi: 10.1007/978-3-319-59174-2\_16
- Vacheron, J., Desbrosses, G., Bouffaud, M. L., Touraine, B., Moënné-Loccoz, Y., Muller, D., et al. (2013). Plant growth-promoting rhizobacteria and root system functioning. *Front. Plant Sci.* 4:356. doi: 10.3389/fpls.2013.00356
- Verma, P., Yadav, A. N., Khannam, K. S., Kumar, S., Saxena, A. K., and Suman, A. (2016). Molecular diversity and multifarious plant growth promoting attributes of Bacilli associated with wheat (*Triticum aestivum* L.) rhizosphere from six diverse agro-ecological zones of India. *J. Basic Microbiol.* 56, 44–58. doi: 10.1002/jobm.201500459
- Wu, X., Xie, Y., Qiao, J., Chai, S., and Chen, L. (2019). Rhizobacteria strain from a hypersaline environment promotes plant growth of *Kengyilia thoroldiana*. *Microbiology* 88, 220–231. doi: 10.1134/S0026261719020127
- Xiong, Y. W., Gong, Y., Li, X. W., Chen, P., Ju, X. Y., Zhang, C. M., et al. (2019). Enhancement of growth and salt tolerance of tomato seedlings by a natural halotolerant actinobacterium *Glutamicibacter halophytocola* KLBMP 5180 isolated from a coastal halophyte. *Plant Soil* 445, 307–322. doi: 10.1007/s11104-019-04310-8
- Zhu, F., Qu, L., Hong, X., and Sun, X. (2011). Isolation and characterization of a phosphate- solubilizing halophilic Bacterium *Kushneria* sp. YCWA18 from daqiao saltern on the coast of yellow sea of China. *Evid. Based Complement. Altern. Med.* 2011:615032. doi: 10.1155/2011/615032

**Conflict of Interest:** The authors declare that the research was conducted in the absence of any commercial or financial relationships that could be construed as a potential conflict of interest.

Copyright © 2021 Yañez-Yazlle, Romano-Armada, Rajal and Irazusta. This is an open-access article distributed under the terms of the Creative Commons Attribution License (CC BY). The use, distribution or reproduction in other forums is permitted, provided the original author(s) and the copyright owner(s) are credited and that the original publication in this journal is cited, in accordance with accepted academic practice. No use, distribution or reproduction is permitted which does not comply with these terms.
