# Supplementary material for: Discerning Transcriptomic and Biochemical Responses of Arabidopsis thaliana Treated with the Biofertilizer Strain Priestia megaterium YC4-R4: Boosting Plant Central and Secondary Metabolism
Source: MDPI journal article supplement (doi:10.3390/plants11223039), 2022-11-10
Supplement: s1 [file s1]

DOI: 10.5586/asbp.3583

**Publication history**

Received: 2018-01-25

Accepted: 2018-05-12

Published: 2018-06-29

**Handling editor**

Grzegorz Jackowski, Faculty  
of Biology, Adam Mickiewicz  
University in Poznań, Poland

**Funding**

This article has received  
financial support from the  
Polish Ministry of Science  
and Higher Education under  
subsidy for maintaining the  
research potential of the Faculty  
of Biology and Chemistry,  
University of Białystok.

**Competing interests**

No competing interests have  
been declared.

**Copyright notice**

© The Author(s) 2018. This is an  
Open Access article distributed  
under the terms of the  
[Creative Commons Attribution  
License](#), which permits  
redistribution, commercial and  
noncommercial, provided that  
the article is properly cited.

**Citation**

Ciereszko I. Regulatory roles  
of sugars in plant growth and  
development. *Acta Soc Bot Pol.*  
2018;87(2):3583. [https://doi.  
org/10.5586/asbp.3583](https://doi.org/10.5586/asbp.3583)

**Digital signature**

This PDF has been certified using digital  
signature with a trusted timestamp to  
assure its origin and integrity. A verification  
trust dialog appears on the PDF document  
when it is opened in a compatible PDF  
reader. Certificate properties provide  
further details such as certification time  
and a signing reason in case any alterations  
made to the final content. If the certificate  
is missing or invalid it is recommended to  
verify the article on the journal website.

**REVIEW**

# Regulatory roles of sugars in plant growth and development

**Iwona Ciereszko\***

Institute of Biology, University of Białystok, Ciołkowskiego 1J, 15-245 Białystok, Poland

\* Email: [icier@uwb.edu.pl](mailto:icier@uwb.edu.pl)**Abstract**

In recent years, several studies have focused on the factors and mechanisms that regulate plant growth and development, as well as the functioning of signaling pathways in plant cells, unraveling the involvement of sugars in the processes regulating such growth and development. Saccharides play an important role in the life of plants: they are structural and storage substances, respiratory substrates, and intermediate metabolites of many biochemical processes. Sucrose is the major transport form of assimilates in plants. Sugars can also play an important role in the defense reactions of plants. However, it has been shown that glucose, sucrose, or trehalose-6-phosphate (Tre6P) can regulate a number of growth and metabolic processes, acting independently of the basal functions; they can also act as signaling molecules. Changes in the concentration, qualitative composition, and transport of sugars occur continuously in plant tissues, during the day and night, as well as during subsequent developmental stages. Plants have developed an efficient system of perception and transmission of signals induced by lower or higher sugar availability. Changes in their concentration affect cell division, germination, vegetative growth, flowering, and aging processes, often independently of the metabolic functions. Currently, the mechanisms of growth regulation in plants, dependent on the access to sugars, are being increasingly recognized. The plant growth stimulating system includes hexokinase (as a glucose sensor), trehalose-6-phosphate, and TOR protein kinase; the lack of Tre6P or TOR kinase inhibits the growth of plants and their transition to the generative phase. It is believed that the plant growth inhibition system consists of SnRK1 protein kinases and C/S1 bZIP transcription factors. The signal transduction routes induced by sugars interact with other pathways in plant tissues (for example, hormonal pathways) creating a complex communication and signaling network in plants that precisely controls plant growth and development.

**Keywords**

glucose; receptor; SnRK; sucrose; sugar signaling; TOR; Tre6P

**Introduction**

The growth and development of plants is regulated by various factors at different levels. Much research has been recently devoted to deciphering the mechanisms of growth, developmental regulation, and interactions between different signaling pathways in plant cells [1–8]. One of the most interesting aspects has been the demonstration of the regulatory function of sugars – molecules known for a long time to be involved in basal cell metabolism, and which are substrates or products of numerous chemical reactions.

The saccharides in plant tissues are primarily produced from triose-phosphates formed during photosynthesis occurring in leaves. Sucrose and starch, the final products of photosynthesis, can be temporarily stored in leaves, but most of the sucrose pool is transported to the acceptor tissues that do not produce this sugar [9–11]. The

- 2016;540:574–578. <https://doi.org/10.1038/nature20591>
94. Bledsoe SW, Henry C, Griffiths CA, Paul MJ, Feil R, Lunn JE, et al. The role of Tre6P and SnRK1 in maize early kernel development and events leading to stress-induced kernel abortion. *BMC Plant Biol.* 2017;17:74. <http://doi.org/10.1186/s12870-017-1018-2>
  95. Jossier M, Bouly JP, Meimoun P, Arjmand A, Lessard P, Hawley S, et al. SnRK1 (SNF1-related kinase1) has a central role in sugar and ABA signalling in *Arabidopsis thaliana*. *Plant J.* 2009;59:316–328. <https://doi.org/10.1111/j.1365-313X.2009.03871.x>
  96. Bai J, Mao J, Yang H, Khan A, Fan A, Liu S, et al. Sucrose non-ferment 1 related protein kinase 2 (*SnRK2*) genes could mediate the stress responses in potato (*Solanum tuberosum* L.). *BMC Genetics.* 2017;18:41. <https://doi.org/10.1186/s12863-017-0506-6>
  97. Simon NM, Kusakina J, Fernández-López Á, Chembath A, Belbin FE, Dodd AN. The energy-signalling hub SnRK1 is important for sucrose-induced hypocotyl elongation. *Plant Physiol.* 2018;176:1299–1310. <https://doi.org/10.1104/pp.17.01395>
  98. Xiong Y, Sheen J. Novel links in the plant TOR kinase signaling network. *Curr Opin Plant Biol.* 2015;28:83–91. <https://doi.org/10.1016/j.pbi.2015.09.006>
  99. Dobrenel T, Caldana C, Hanson J, Robaglia C, Vincentz M, Veit B, et al. TOR signaling and nutrient sensing. *Annu Rev Plant Biol.* 2016;67:261–285. <https://doi.org/10.1146/annurev-arplant-043014-114648>
  100. Li X, Cai W, Liu Y, Li H, Fu L, Liu Z, et al. Differential TOR activation and cell proliferation in *Arabidopsis* root and shoot apices. *Proc Natl Acad Sci USA.* 2017;114:2765–2770. <https://doi.org/10.1073/pnas.1618782114>
  101. Lee K, Seo PJ. *Arabidopsis* TOR signaling is essential for sugar-regulated callus formation. *J Integr Plant Biol.* 2017;59:742–746. <https://doi.org/10.1111/jipb.12560>
  102. Schepetilnikov M, Ryabova LA. Recent discoveries on the role of TOR (target of rapamycin) signaling in translation in plants. *Plant Physiol.* 2018;176:1095–1105. <https://doi.org/10.1104/pp.17.01243>
  103. Gupta A, Singh M, Laxmi A. Multiple interactions between glucose and brassinosteroid signal transduction pathways in *Arabidopsis* are uncovered by whole-genome transcriptional profiling. *Plant Physiol.* 2015;168:1091–1105. <https://doi.org/10.1104/pp.15.00495>
  104. Zhang Y, He J. Sugar-induced plant growth is dependent on brassinosteroids. *Plant Signal Behav.* 2015;10(12):e1082700. <https://doi.org/10.1080/15592324.2015.1082700>
  105. Djami-Tchatchou AT, Sanan-Mishra N, Ntushelo K, Dubery IA. Functional roles of microRNAs in agronomically important plants – potential as targets for crop improvement and protection. *Front Plant Sci.* 2017;8:378. <https://doi.org/10.3389/fpls.2017.00378>
  106. Huang H, Long J, Zheng L, Li Y, Hu Y, Yu G, et al. Identification and characterization of microRNAs in maize endosperm response to exogenous sucrose using small RNA sequencing. *Genomics.* 2016;108:216–223. <https://doi.org/10.1016/j.ygeno.2016.10.007>
