# Supplementary material for: Discerning Transcriptomic and Biochemical Responses of Arabidopsis thaliana Treated with the Biofertilizer Strain Priestia megaterium YC4-R4: Boosting Plant Central and Secondary Metabolism
Source: Plants (Basel). 2022 Nov 10;11(22):3039. doi: 10.3390/plants11223039 (PMC9697256; doi:10.3390/plants11223039)
Supplement: Supplementary file 1 [file plants-11-03039-s001.zip]

Archive with 9 entries (9 files):
- Ref. 15.pdf
- Ref. 70.pdf
- Ref. 75.pdf
- Supplementary Figure S1. Root phenotyping after treatment.tiff
- Supplementary Figure S2. RNA-seq downregulated DEGs.jpg
- Supplementary Figure S3. Downregulated DGEs Heatmap.tiff
- Supplementary Figure S4. Upregulated DEGs Heatmap.tiff
- Supplementary Figure S5. Downregulated key gene expression levels.tiff
- Table S1. DEGs considered in this study.pdf
